# Supplementary material for: Association of Heme Oxygenase 1 with Lung Protection in Malaria-Associated ALI/ARDS
Source: Hindawi journal article supplement (doi:10.1155/2016/4158698), 2016-01-01

Fig S1

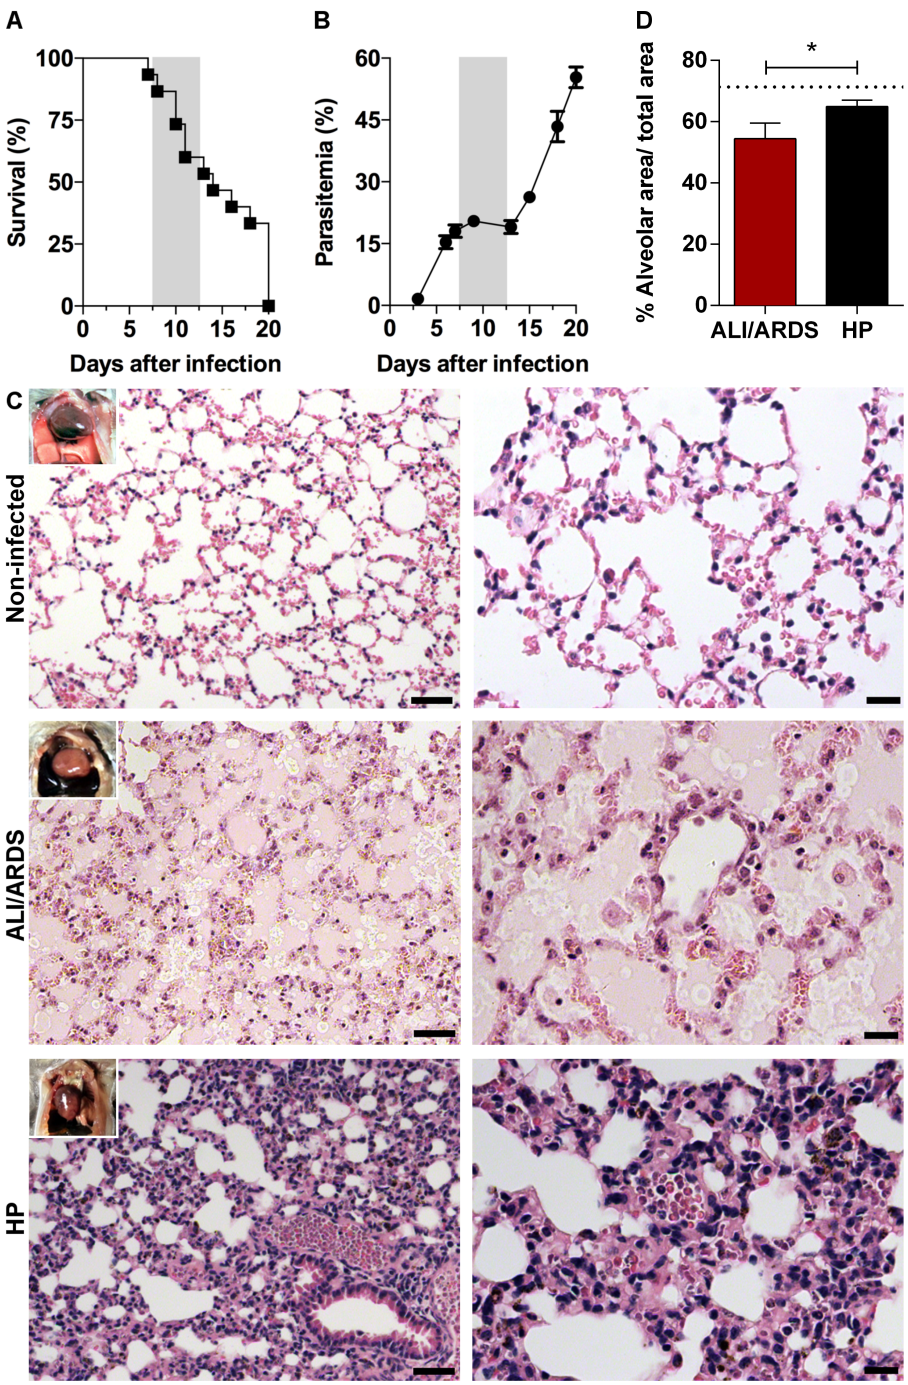

Fig S2

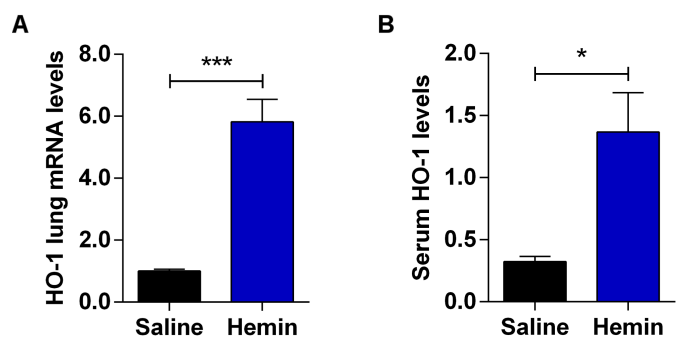

Supplement: f1 [file 4158698.f1.pdf]
